# Supplementary material for: Effects of the Ratio of Substituting Mineral Fertilizers with Manure Nitrogen on Soil Properties and Vegetable Yields in China: A Meta-Analysis
Source: MDPI journal article supplement (doi:10.3390/plants12040964), 2023-02-20
Supplement: s1 [file s1]

# Effects of the ratio of substituting mineral fertilizers with manure nitrogen on soil properties and vegetable yields in China: A meta-analysis

Shaobo Wang<sup>1</sup>, Rui Lv<sup>1</sup>, Xinhua Yin<sup>2</sup>, Puyu Feng<sup>1</sup>, and Kelin Hu<sup>1,\*</sup>

1 College of Land Science and Technology, China Agricultural University, Key Laboratory of Arable Land Con-servation (North China), Ministry of Agriculture, Beijing, 100193, China

2 Department of Plant Sciences, University of Tennessee, Knoxville, TN 37996, USA

\* Correspondence: hukel@cau.edu.cn

**Table S1.** Divided groups in the categorical meta-analysis of soil nutrient (soil organic carbon(g/kg), SOC; soil total nitrogen(g/kg), STN; microbial biomass carbon (C) and nitrogen (N)(mg/kg), MBC/N; available phosphorus and potassium (mg/kg), (AP/AK)) responses to different manure N SRs compared to mineral fertilizer.

SOC

| Index             | Low SR( <i>n</i> = 106) |          | Medium SR( <i>n</i> = 89) |          | High SR( <i>n</i> = 79) |          |
|-------------------|-------------------------|----------|---------------------------|----------|-------------------------|----------|
|                   | Qb                      | <i>p</i> | Qb                        | <i>p</i> | Qb                      | <i>p</i> |
| MAP               | 32.83                   | 0.001    | 31.36                     | 0.001    | 19.40                   | 0.024    |
| MAT               | 28.64                   | 0.001    | 19.21                     | 0.01     | 15.21                   | 0.047    |
| Climate zone      | 22.24                   | 0.001    | 32.68                     | 0.001    | 7.53                    | 0.087    |
| pH                | 18.19                   | 0.011    | 17.44                     | 0.042    | 10.41                   | 0.025    |
| SOC               | 21.11                   | 0.039    | 10.02                     | 0.028    | 28.96                   | 0.009    |
| Soil texture      | 10.98                   | 0.024    | 11.91                     | 0.028    | 16.28                   | 0.101    |
| Cultivation types | 33.17                   | 0.001    | 10.00                     | 0.025    | 6.04                    | 0.026    |
| Planting years    | 2.95                    | 0.016    | 35.46                     | 0.003    | 18.35                   | 0.047    |
| N application     | 17.96                   | 0.004    | 28.52                     | 0.004    | 22.59                   | 0.016    |

Note: MAP, mean annual precipitation(mm); MAT, mean annual temperature(°C); SOC, Soil organic carbon(g/kg). Low SR, SR ≤ 35%; Medium SR, 35% < SR ≤ 70%; High SR, SR > 70%; Qb, between-group heterogeneity. ; *p* < 0.05 indicates a significant difference.

STN

| Index             | Low SR( <i>n</i> = 37) |          | Medium SR( <i>n</i> = 22) |          | High SR( <i>n</i> = 42) |          |
|-------------------|------------------------|----------|---------------------------|----------|-------------------------|----------|
|                   | Qb                     | <i>p</i> | Qb                        | <i>p</i> | Qb                      | <i>p</i> |
| MAP               | 52.47                  | 0.001    | 8.90                      | 0.281    | 0.37                    | 0.913    |
| MAT               | 17.59                  | 0.152    | 26.45                     | 0.006    | 4.36                    | 0.288    |
| Climate zone      | 7.23                   | 0.237    | 0.96                      | 0.679    | 3.40                    | 0.176    |
| pH                | 49.10                  | 0.048    | 0.59                      | 0.918    | 12.70                   | 0.081    |
| SOC               | 17.43                  | 0.161    | 10.41                     | 0.218    | 1.07                    | 0.761    |
| Soil texture      | 23.50                  | 0.021    | 12.31                     | 0.294    | 10.02                   | 0.112    |
| Cultivation types | 35.03                  | 0.01     | 24.66                     | 0.026    | 9.52                    | 0.034    |
| Planting years    | 13.10                  | 0.41     | 15.60                     | 0.139    | 4.30                    | 0.47     |
| N application     | 31.18                  | 0.021    | 1.50                      | 0.726    | 8.33                    | 0.093    |

Note: MAP, mean annual precipitation(mm); MAT, mean annual temperature(°C); SOC, Soil organic carbon(g/kg). Low SR, SR ≤ 35%; Medium SR, 35% < SR ≤ 70%; High SR, SR > 70%; Qb, between-group heterogeneity ; *p* < 0.05 indicates a significant difference.

## MBC

| Index             | Low SR( <i>n</i> = 24) |          | Medium SR( <i>n</i> = 21) |          | High SR( <i>n</i> = 16) |          |
|-------------------|------------------------|----------|---------------------------|----------|-------------------------|----------|
|                   | Qb                     | <i>p</i> | Qb                        | <i>p</i> | Qb                      | <i>p</i> |
| MAP               | 6.57                   | 0.255    | 22.80                     | 0.002    | 8.46                    | 0.114    |
| MAT               | 23.98                  | 0.004    | 2.83                      | 0.083    | 14.41                   | 0.008    |
| Climate zone      | 6.81                   | 0.108    | 15.89                     | 0.003    | 16.35                   | 0.026    |
| pH                | 7.83                   | 0.084    | 22.08                     | 0.001    | 0.91                    | 0.507    |
| SOC               | 17.71                  | 0.008    | 0.97                      | 0.565    | 31.23                   | 0.001    |
| Soil texture      | 15.23                  | 0.002    | 4.96                      | 0.171    | 0.63                    | 0.573    |
| Cultivation types | 14.22                  | 0.017    | 0.01                      | 0.922    | 5.38                    | 0.111    |
| Planting years    | 15.46                  | 0.017    | 11.27                     | 0.024    | 26.35                   | 0.26     |
| N application     | 12.18                  | 0.026    | 0.15                      | 0.683    | 0.88                    | 0.503    |

Note: MAP, mean annual precipitation(mm); MAT, mean annual temperature(°C); SOC, Soil organic carbon(g/kg). Low SR,  $SR \leq 35\%$ ; Medium SR,  $35\% < SR \leq 70\%$ ; High SR,  $SR > 70\%$ ; Qb, between-group heterogeneity. ;  $p < 0.05$  indicates a significant difference.

## MBN

| Index             | Low SR( <i>n</i> = 24) |          | Medium SR( <i>n</i> = 18) |          | High SR( <i>n</i> = 14) |          |
|-------------------|------------------------|----------|---------------------------|----------|-------------------------|----------|
|                   | Qb                     | <i>p</i> | Qb                        | <i>p</i> | Qb                      | <i>p</i> |
| MAP               | 1.283                  | 0.741    | 1.461                     | 0.379    | 1.990                   | 0.535    |
| MAT               | 26.575                 | 0.001    | 1.750                     | 0.323    | 18.648                  | 0.005    |
| Climate zone      | 1.063                  | 0.447    | 0.859                     | 0.520    | 21.489                  | 0.064    |
| pH                | 15.408                 | 0.006    | 0.859                     | 0.512    | 5.995                   | 0.050    |
| SOC               | 26.350                 | 0.003    | 2.819                     | 0.443    | 2.908                   | 0.192    |
| Soil texture      | 15.264                 | 0.021    | 37.524                    | 0.004    | 5.995                   | 0.059    |
| Cultivation types | 4.992                  | 0.120    | 13.799                    | 0.001    | 21.489                  | 0.090    |
| Planting years    | 24.412                 | 0.020    | 36.888                    | 0.005    | 44.841                  | 0.000    |
| N application     | 27.991                 | 0.003    | 3.017                     | 0.162    | 26.647                  | 0.021    |

Note: MAP, mean annual precipitation(mm); MAT, mean annual temperature(°C); SOC, Soil organic carbon(g/kg). Low SR,  $SR \leq 35\%$ ; Medium SR,  $35\% < SR \leq 70\%$ ; High SR,  $SR > 70\%$ ; Qb, between-group heterogeneity. ;  $p < 0.05$  indicates a significant difference.

AP

| Index             | Low SR( <i>n</i> = 114) |          | Medium SR( <i>n</i> = 94) |          | High SR( <i>n</i> = 72) |          |
|-------------------|-------------------------|----------|---------------------------|----------|-------------------------|----------|
|                   | Qb                      | <i>p</i> | Qb                        | <i>p</i> | Qb                      | <i>p</i> |
| MAP               | 22.168                  | 0.034    | 1.340                     | 0.785    | 4.892                   | 0.100    |
| MAT               | 25.558                  | 0.014    | 12.656                    | 0.139    | 12.683                  | 0.006    |
| Climate zone      | 4.764                   | 0.266    | 0.104                     | 0.866    | 9.335                   | 0.009    |
| pH                | 13.251                  | 0.297    | 23.936                    | 0.067    | 2.789                   | 0.422    |
| SOC               | 31.332                  | 0.053    | 16.981                    | 0.139    | 5.489                   | 0.166    |
| Soil texture      | 11.869                  | 0.347    | 23.525                    | 0.019    | 9.104                   | 0.040    |
| Cultivation types | 1.375                   | 0.568    | 18.138                    | 0.015    | 0.031                   | 0.874    |
| Planting years    | 27.588                  | 0.067    | 18.384                    | 0.006    | 6.610                   | 0.118    |
| N application     | 3.141                   | 0.686    | 26.355                    | 0.012    | 13.538                  | 0.005    |

Note: MAP, mean annual precipitation(mm); MAT, mean annual temperature(°C); SOC, Soil organic carbon(g/kg). Low SR,  $SR \leq 35\%$ ; Medium SR,  $35\% < SR \leq 70\%$ ; High SR,  $SR > 70\%$ ; Qb, between-group heterogeneity. ;  $p < 0.05$  indicates a significant difference.

AK

| Index             | Low SR( <i>n</i> = 118) |          | Medium SR( <i>n</i> = 93) |          | High SR( <i>n</i> = 73) |          |
|-------------------|-------------------------|----------|---------------------------|----------|-------------------------|----------|
|                   | Qb                      | <i>p</i> | Qb                        | <i>p</i> | Qb                      | <i>p</i> |
| MAP               | 27.494                  | 0.002    | 32.042                    | 0.001    | 1.549                   | 0.354    |
| MAT               | 15.495                  | 0.073    | 7.579                     | 0.103    | 1.825                   | 0.264    |
| Climate zone      | 3.883                   | 0.246    | 0.019                     | 0.921    | 1.099                   | 0.189    |
| pH                | 24.734                  | 0.001    | 4.511                     | 0.340    | 0.403                   | 0.858    |
| SOC               | 0.533                   | 0.969    | 10.056                    | 0.109    | 0.084                   | 0.986    |
| Soil texture      | 17.574                  | 0.106    | 5.807                     | 0.273    | 0.378                   | 0.897    |
| Cultivation types | 7.200                   | 0.118    | 0.043                     | 0.873    | 1.532                   | 0.125    |
| Planting years    | 10.069                  | 0.305    | 23.000                    | 0.001    | 0.744                   | 0.766    |
| N application     | 1.836                   | 0.751    | 0.363                     | 0.890    | 0.120                   | 0.898    |

Note: MAP, mean annual precipitation(mm); MAT, mean annual temperature(°C); SOC, Soil organic carbon(g/kg). Low SR,  $SR \leq 35\%$ ; Medium SR,  $35\% < SR \leq 70\%$ ; High SR,  $SR > 70\%$ ; Qb, between-group heterogeneity. ;  $p < 0.05$  indicates a significant difference.

Table S2. Number of observations, mean, median, and 95% confidence intervals for soil properties under different substitution ratio(SR).

| Soil properties           | Treatment  | <i>n</i> | Mean   | Median | 95% <i>CI</i> |
|---------------------------|------------|----------|--------|--------|---------------|
| SOC(g kg <sup>-1</sup> )  | MF         | 102      | 10.7c  | 12.2   | 6.2-20.3      |
|                           | SR≤35%     | 106      | 15.1b  | 15.8   | 10.3-24.9     |
|                           | 35%<SR≤70% | 89       | 16.3a  | 16.1   | 4.5-27.9      |
|                           | SR>70%     | 80       | 16.4a  | 16.0   | 9.2-27.5      |
| STN(g kg <sup>-1</sup> )  | MF         | 42       | 1.0c   | 1.1    | 0.5-2.4       |
|                           | SR≤35%     | 38       | 1.3b   | 1.7    | 0.5-3.3       |
|                           | 35%<SR≤70% | 22       | 1.8a   | 1.2    | 0.2-3.1       |
|                           | SR>70%     | 43       | 1.4b   | 1.5    | 0.6-2.3       |
| MBC(mg kg <sup>-1</sup> ) | MF         | 20       | 19.1d  | 12.9   | 2-53.9        |
|                           | SR≤35%     | 25       | 29.6c  | 15.9   | 1.5-123       |
|                           | 35%<SR≤70% | 22       | 78.4b  | 89.2   | 11.4-158.2    |
|                           | SR>70%     | 17       | 100.3a | 67.0   | 21-293        |
| MBN(mg kg <sup>-1</sup> ) | MF         | 20       | 8.5d   | 1.8    | 0.6-53        |
|                           | SR≤35%     | 25       | 15.9c  | 11.8   | 0.3-68.1      |
|                           | 35%<SR≤70% | 22       | 25.3b  | 22.5   | 2.7-78.1      |
|                           | SR>70%     | 17       | 29.7a  | 24.4   | 2.3-69.4      |
| AP(mg kg <sup>-1</sup> )  | MF         | 103      | 115.0b | 86.3   | 15.4-396.3    |
|                           | SR≤35%     | 115      | 138.6a | 114.9  | 17.4-337.6    |
|                           | 35%<SR≤70% | 95       | 139.4a | 110.7  | 17.4-403      |
|                           | SR>70%     | 73       | 137.8a | 107.8  | 19-420        |
| AK(mg kg <sup>-1</sup> )  | MF         | 99       | 241.0b | 172.3  | 17-820        |
|                           | SR≤35%     | 119      | 245.6b | 229.4  | 64.5-602      |
|                           | 35%<SR≤70% | 93       | 266.9a | 265.0  | 14.4-721      |
|                           | SR>70%     | 73       | 260.3a | 236.5  | 16.8-912      |

Note: SOC, soil organic carbon; STN, soil total nitrogen; MBC, microbial biomass carbon; MBN, microbial biomass nitrogen; AP, available phosphorus; AK, available potassium. MF, mineral fertilizers; n=number of measurements; Means in a row followed by different letters are significantly different at  $p < 0.05$ .

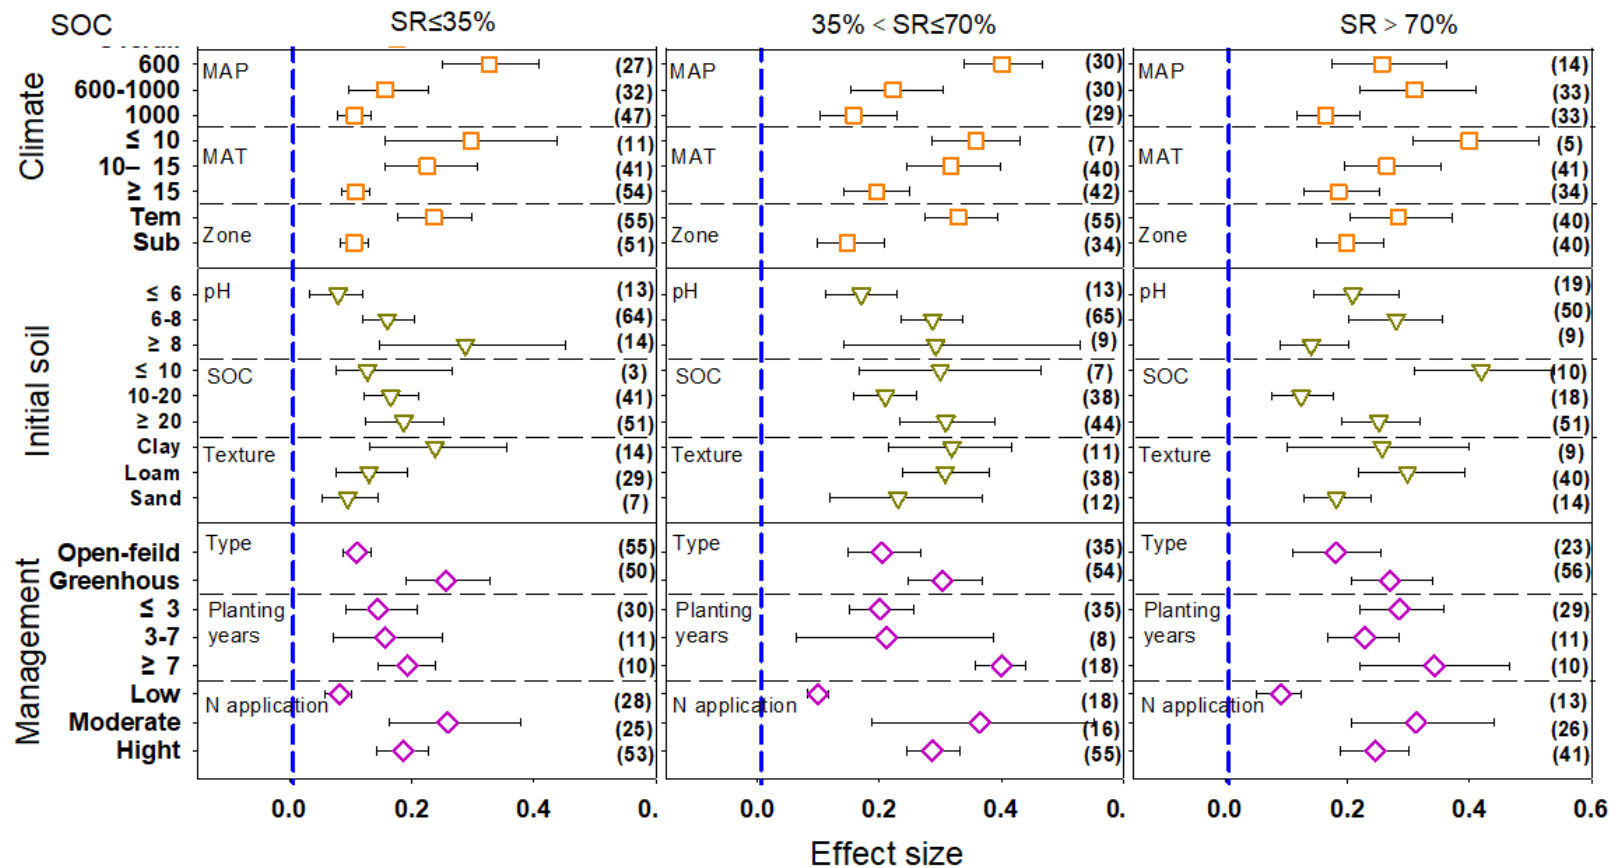

**Figure S1.** Effect of organic manure substitution ratios (SR) on soil organic carbon (SOC, g/kg) with different climatic conditions, initial soil properties, and management practices. Note: MAP is mean annual precipitation (mm), MAT is mean annual temperature(°C); SOC, Soil organic carbon(g/kg).Tem is temperate climate zone, Sub is subtropical climate zone, and Type is cultivation type. Dashed line indicates effect size = 0.

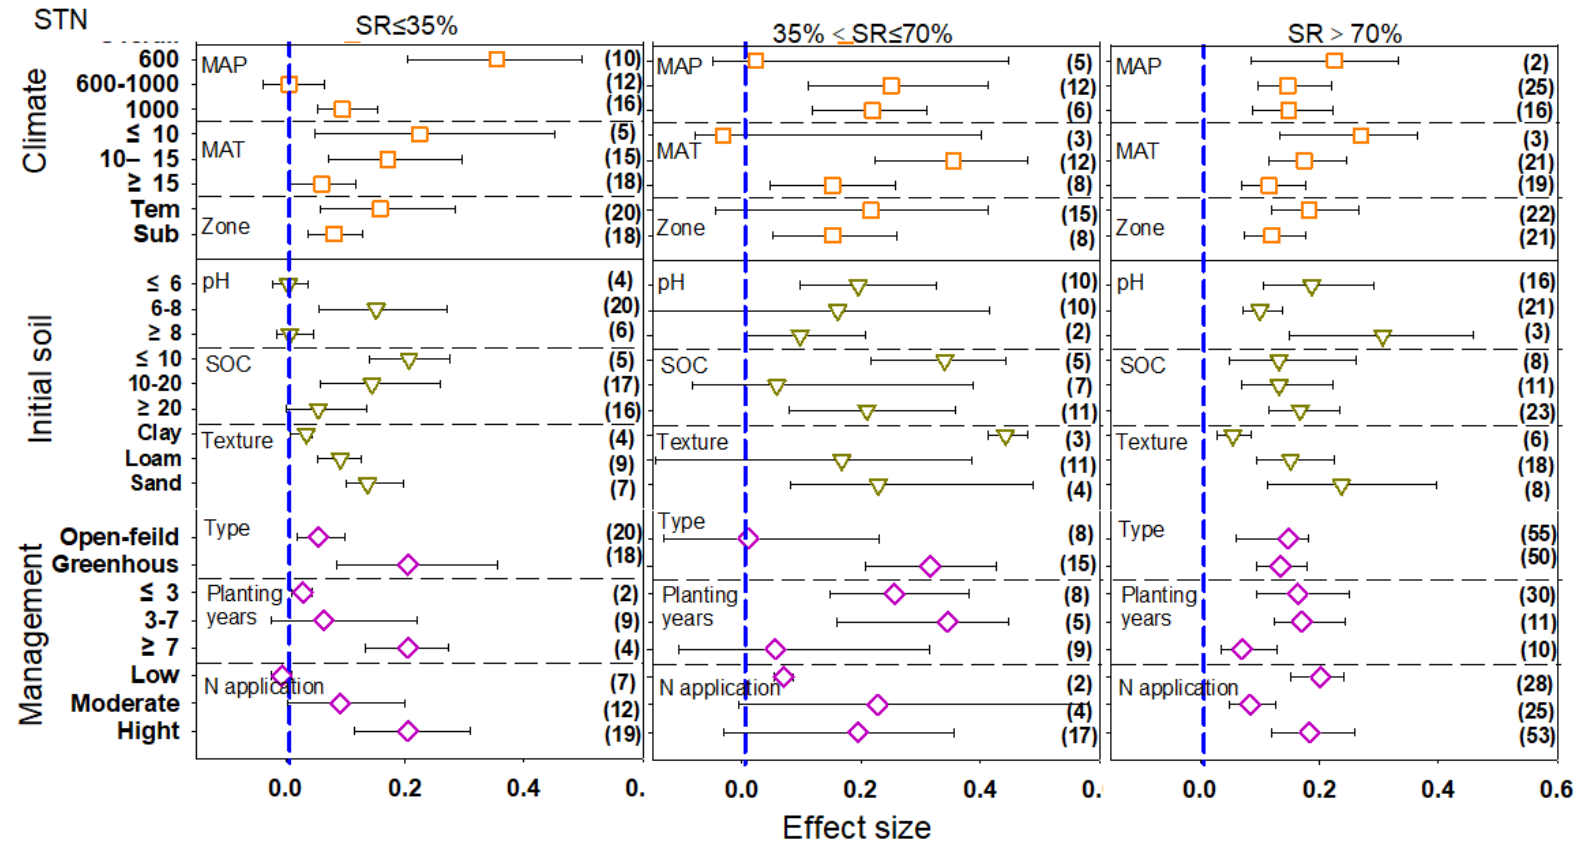

**Figure S2.** Effect of manure N substitution ratios (SR) on soil total nitrogen (STN, g/kg) with different climatic conditions, initial soil properties, and management practices. Note: MAP is mean annual precipitation(mm), MAT is mean annual temperature (°C); SOC, Soil organic carbon(g/kg). Tem is temperate climate zone, Sub is subtropical climate zone, and Type is cultivation type. Dashed line indicates effect size = 0.

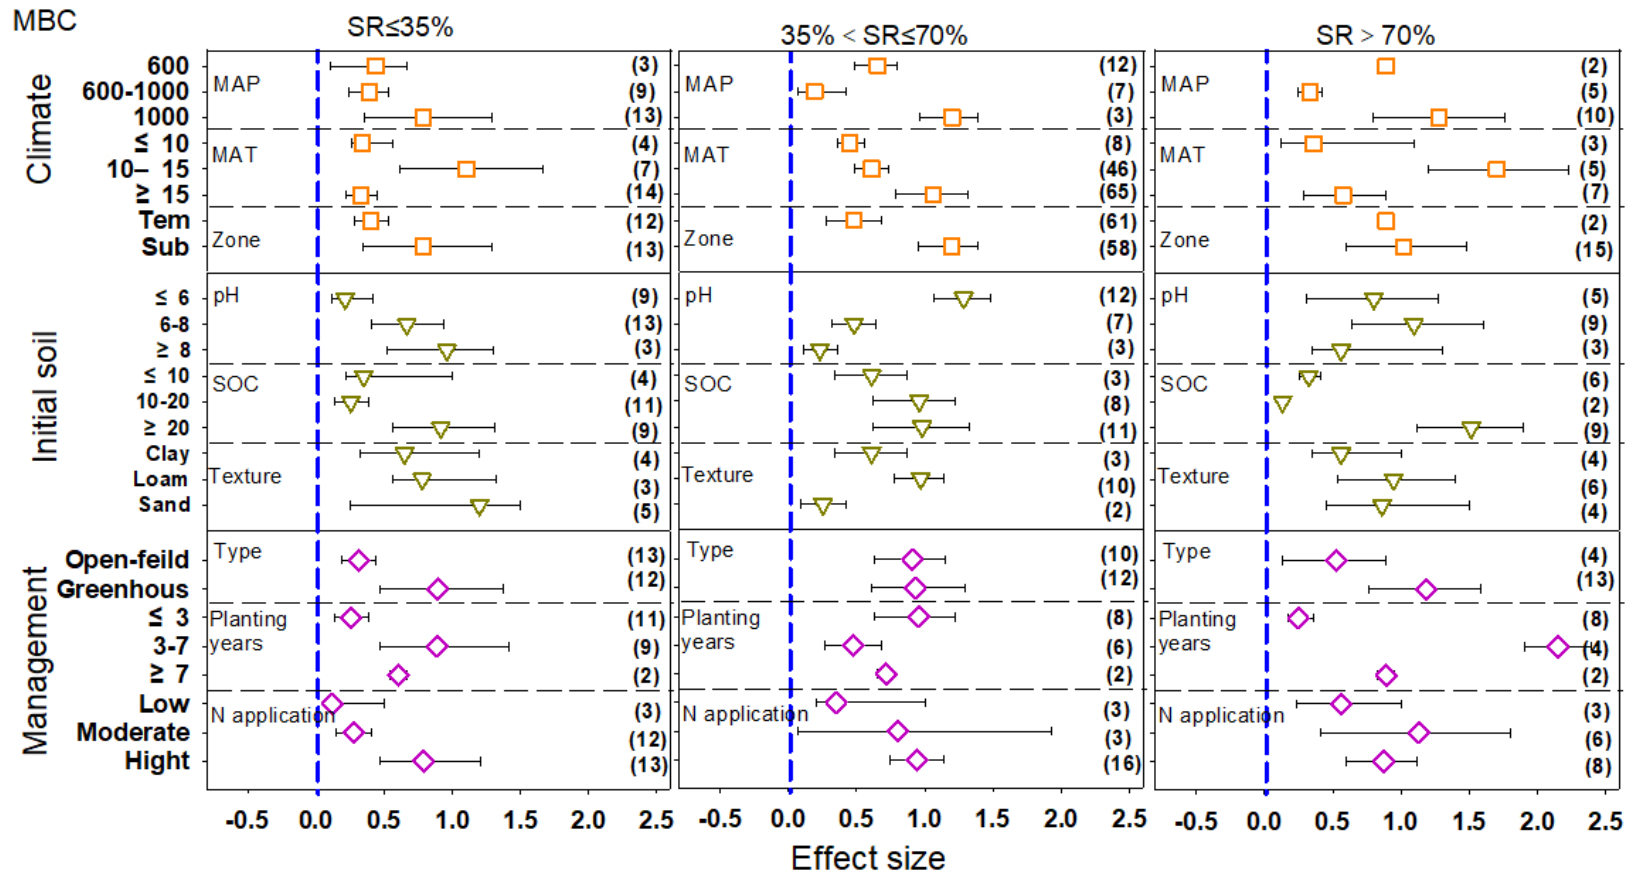

**Figure S3.** Effect of manure N substitution ratios (SR) on microbial biomass carbon (MBC, mg/kg) with different climatic conditions, initial soil properties, and management practices. Note: MAP is mean annual precipitation(mm), MAT is mean annual temperature(°C), SOC, Soil organic carbon(g/kg). Tem is temperate climate zone, Sub is subtropical climate zone, and Type is cultivation type. Dashed line indicates effect size = 0.

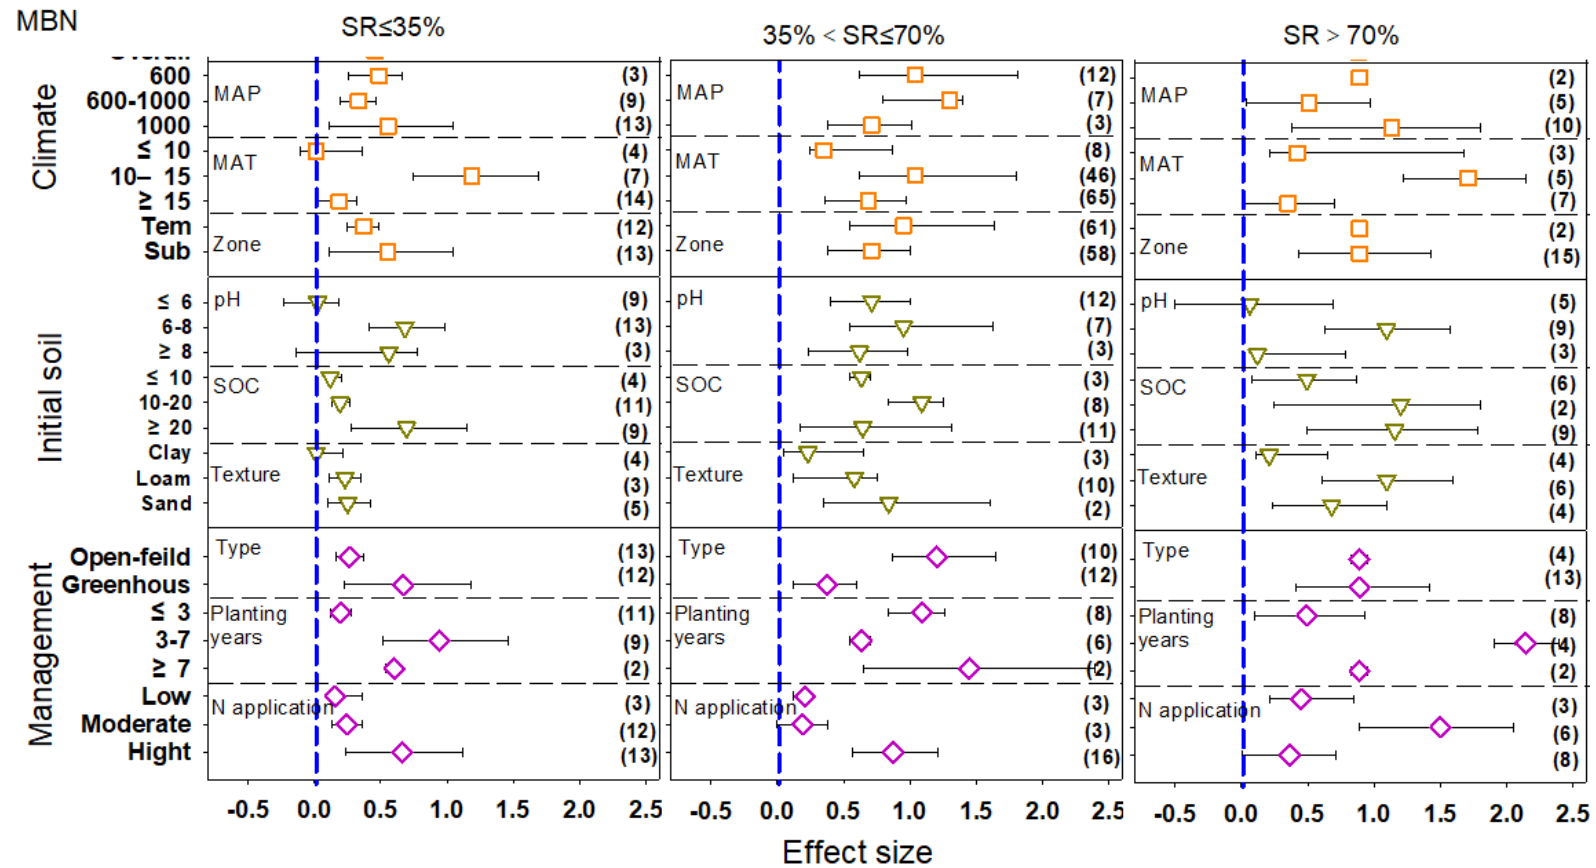

**Figure S4.** Effect of manure N substitution ratios (SR) on microbial biomass nitrogen (MBN, mg/kg) with different climatic conditions, initial soil properties, and management practices. Note: MAP is mean annual precipitation(mm), MAT is mean annual temperature(°C), SOC, Soil organic carbon(g/kg). Tem is temperate climate zone, Sub is subtropical climate zone, and Type is cultivation type. Dashed line indicates effect size = 0.

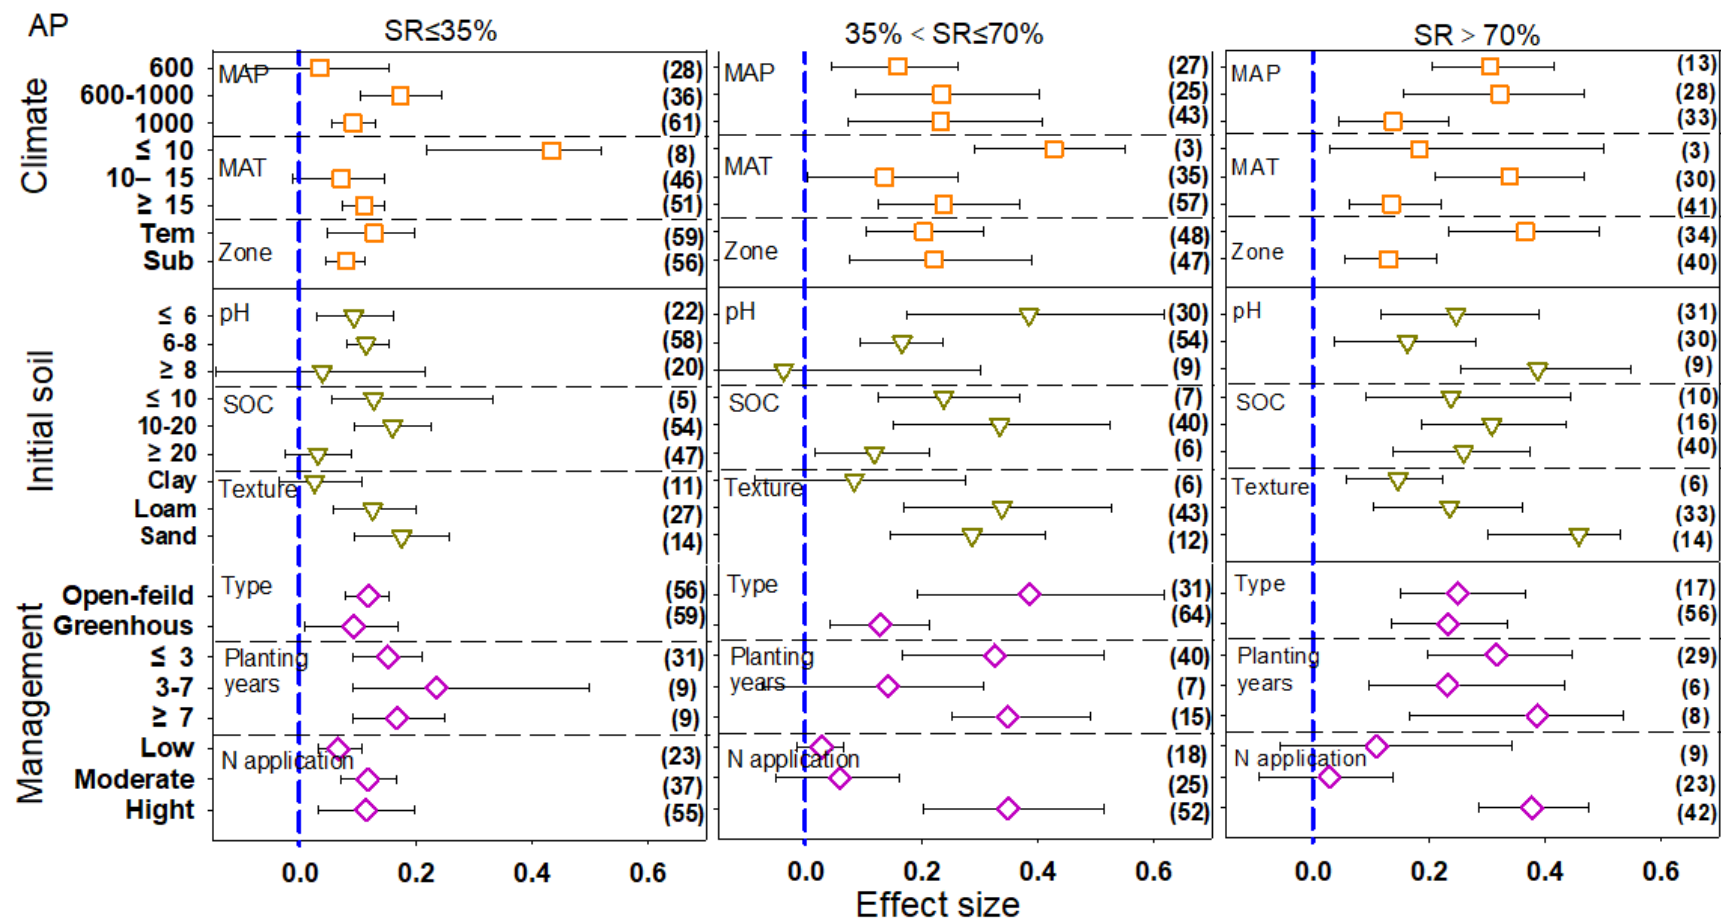

**Figure S5.** Effect of manure N substitution ratios (SR) on available phosphorus (AP, mg/kg) with different climatic conditions, initial soil properties, and management practices. Note: MAP is mean annual precipitation(mm), MAT is mean annual temperature(°C); SOC, Soil organic carbon(g/kg).Tem is temperate climate zone, Sub is subtropical climate zone, and Type is cultivation type. Dashed line indicates effect size = 0.

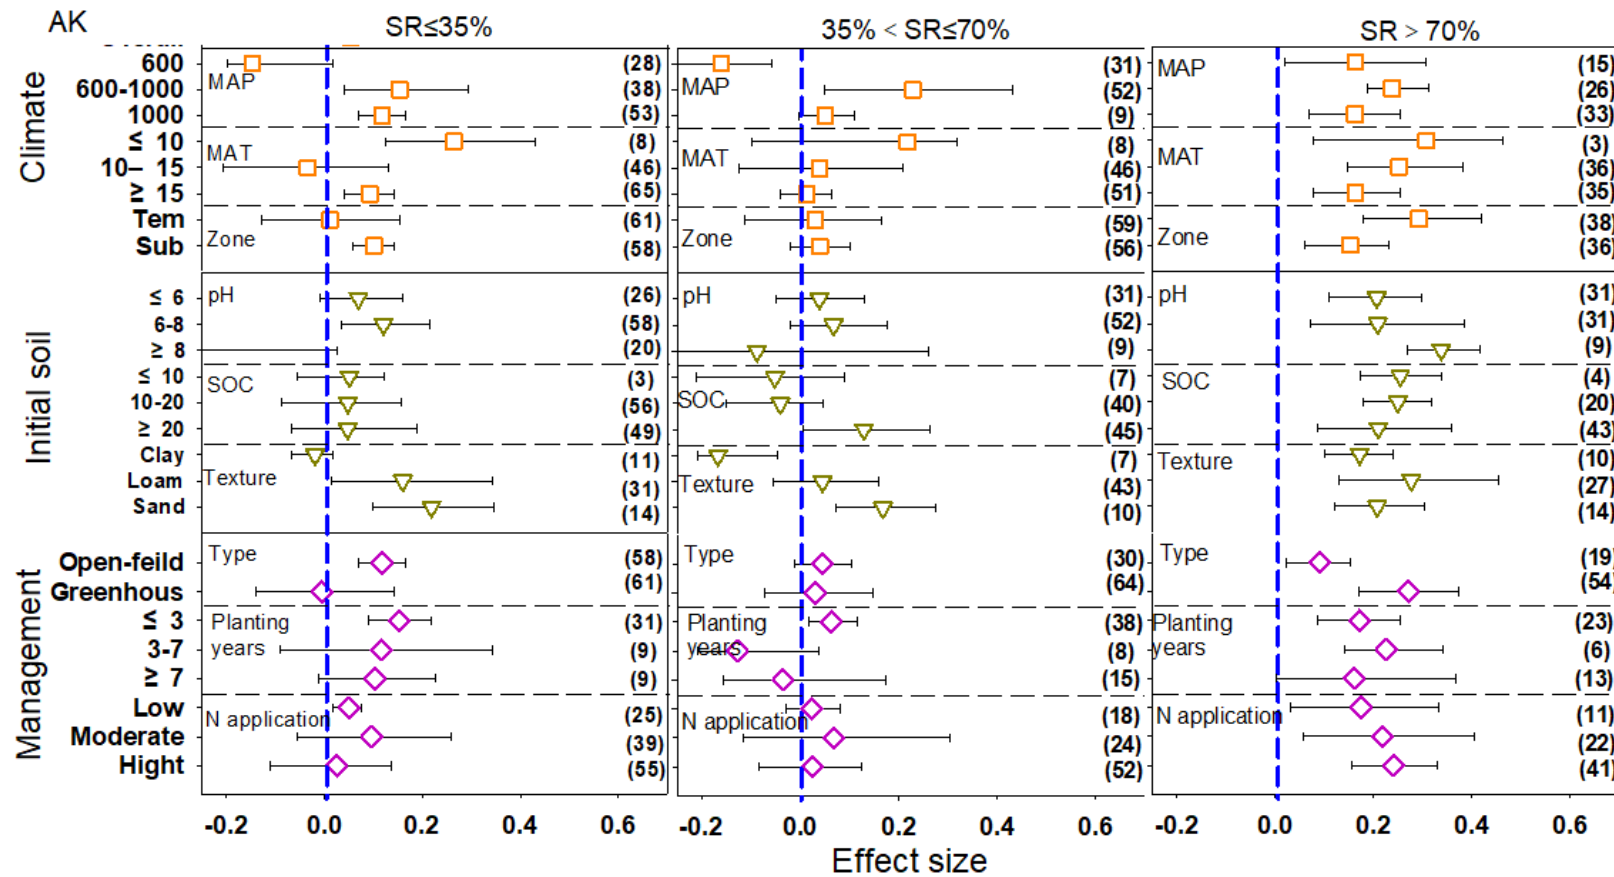

**Figure S6.** Effect of manure N substitution ratios (SR) on available potassium (AK, mg/kg) with different climatic conditions, initial soil properties, and management practices. Note: MAP is mean annual precipitation(mm), MAT is mean annual temperature(°C); SOC, Soil organic carbon(g/kg). Tem is temperate climate zone, Sub is subtropical climate zone, and Type is cultivation type. Dashed line indicates effect size = 0.

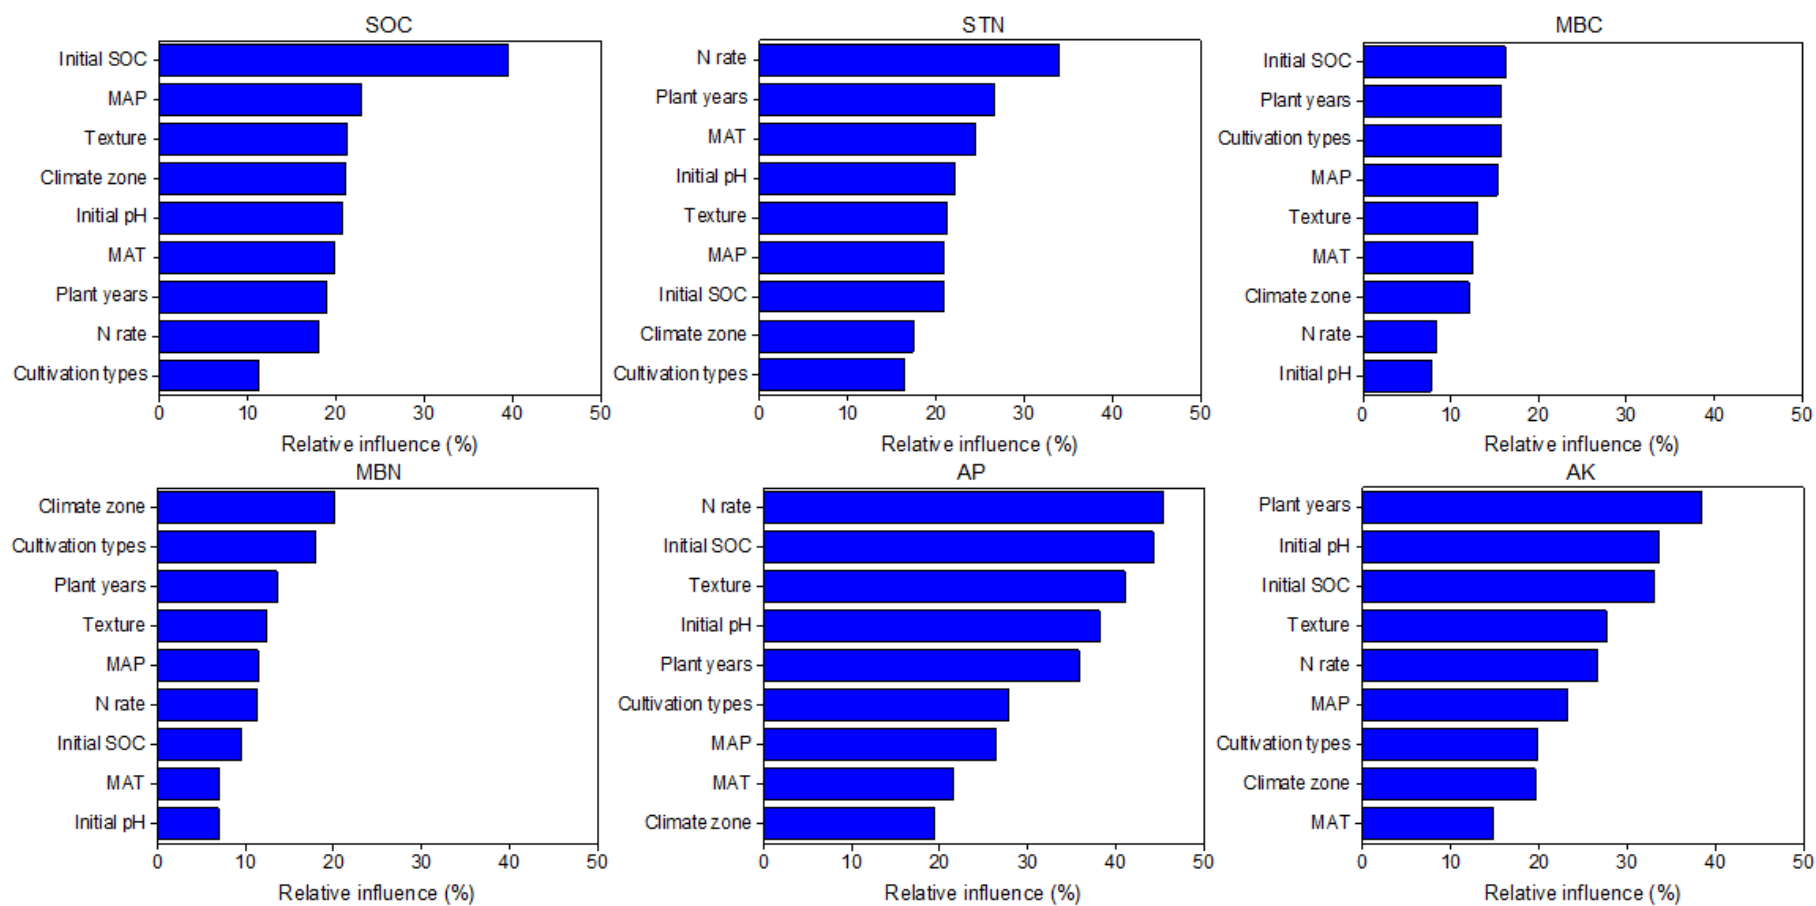

**Figure S7.** Relative influence of predictor variables on soil nutrients (SOC, Soil organic carbon(g/kg; STN, soil total N; MBC/MBN, microbial biomass C/N; AP, available phosphorus; AK, available potassium). Note: MAP is mean annual precipitation(mm), MAT is mean annual temperature(°C).
